# Supplementary material
Source: PubMed Central journal article supplement (PMC5740008)
Supplement: NIHMS915554-supplement.pdf [file NIHMS915554-supplement.pdf]

Supplementary Materials for  
 “Genetic fine-mapping and identification of candidate genes and  
 variants for adiposity traits in outbred rats”

Keele *et al*

## Contents

|          |                                                                                 |           |
|----------|---------------------------------------------------------------------------------|-----------|
| <b>1</b> | <b>Animals</b>                                                                  | <b>2</b>  |
| 1.1      | Housing . . . . .                                                               | 2         |
| <b>2</b> | <b>Statistical genetic analysis</b>                                             | <b>2</b>  |
| 2.1      | Modeling genetic effects on adiposity . . . . .                                 | 2         |
| 2.2      | Heritability estimation . . . . .                                               | 2         |
| 2.3      | QTL mapping . . . . .                                                           | 2         |
| 2.4      | Fine-mapping through Group-LASSO with fractional resample model averaging . . . | 3         |
| 2.5      | Estimating diplotype substitution effects at detected QTL . . . . .             | 3         |
| <b>3</b> | <b>Analysis of RNA-Seq data</b>                                                 | <b>4</b>  |
| <b>4</b> | <b>Mediation analysis of phenotype, expression, and QTL</b>                     | <b>4</b>  |
| <b>5</b> | <b>Mediation analysis results</b>                                               | <b>5</b>  |
| 5.1      | Body weight chromosome 4 locus . . . . .                                        | 6         |
| 5.2      | RetroFat chromosome 1 locus . . . . .                                           | 6         |
| 5.3      | RetroFat chromosome 6 locus . . . . .                                           | 6         |
| <b>6</b> | <b>Figures</b>                                                                  | <b>7</b>  |
| 6.1      | Principal component analysis . . . . .                                          | 7         |
| 6.2      | LLARRMA-dawg fine-mapping interval . . . . .                                    | 8         |
| 6.3      | Genes present in RetroFat chromosome 6 fine-mapping interval . . . . .          | 9         |
| 6.4      | Candidate mediators: <i>Krtcap3</i> and <i>Slc30a3</i> . . . . .                | 10        |
| <b>7</b> | <b>Tables</b>                                                                   | <b>11</b> |
| 7.1      | Genes in RetroFat chromosome 6 QTL interval . . . . .                           | 11        |
| 7.2      | Genes in RetroFat chromosome 1 QTL interval . . . . .                           | 15        |
| 7.3      | Genes in body weight chromosome 4 QTL interval . . . . .                        | 17        |
| 7.4      | Potential mediators in RetroFat chromosome 6 QTL interval . . . . .             | 18        |
| 7.5      | Candidate mediators of RetroFat chromosome 6 QTL . . . . .                      | 19        |

## 1 Animals

### 1.1 Housing

Rats were housed two per cage in micro-isolation cages in a conventional facility using autoclaved bedding (sani-chips from PJ Murphy). They had *ad libitum* access to autoclaved Teklad 5010 diet (Harlan Laboratories) and were provided reverse osmosis water chlorinated to 2-3 ppm.

## 2 Statistical genetic analysis

### 2.1 Modeling genetic effects on adiposity

All statistical genetic analyses described used the same general model (or approximations to it) for linking the genetics of a given rat to its measured phenotypic outcome. This was the linear mixed effect model (LMM)

$$f(y_i) = \text{covariates}_i + \text{QTL}_i(m) + u_i + \text{residual}_i, \quad (1)$$

where, in brief:  $f(y_i)$  is the phenotype subject to a normalizing transformation, specifically, as a conservative measure to rein in high influence data points, we used the rank inverse normal transformation;  $\text{covariates}_i$  is a fixed effects term that includes variables representing time food deprived, order of tissue harvest, and dissector (notably, dissector significantly affected EpiFat and BMI.Tail.Base);  $\text{QTL}_i(m)$  represents the effect of the quantitative trait locus (QTL) at genomic locus  $m$ , and is defined in more detail below; and  $\text{residual}_i$  models the remaining individual-to-individual variation as a normal deviate with variance  $\sigma^2$ . The  $u_i$  term is a random polygenic effect representing the effect of overall genetic relatedness, modeled as vector  $\mathbf{u} = (u_i, \dots, u_n)$  drawn from a multivariate normal with covariance matrix  $\mathbf{G}\tau^2$ , where  $\tau^2$  is unknown and  $\mathbf{G}$  is the realized genetic relationship matrix, estimated as the pairwise distance in allelic dosages defined by the identity by descent (IBD) probabilities from founder haplotypes, standardized by allele frequency and averaged over loci across the genome, calculated using the `kinship.probs` function in the `DOQTL` R package (Gatti *et al.* 2014). The LMM in Eq 1 with  $\text{QTL}_i(m)$  omitted is hereafter referred to as “the null model”.

### 2.2 Heritability estimation

Narrow-sense heritability,

$$h^2 = \frac{\tau^2}{\tau^2 + \sigma^2} \times 100\%,$$

was estimated for each phenotype by fitting the null model as a Bayesian LMM using INLA (Rue *et al.* 2009; Holand *et al.* 2013), which gives a complete posterior distribution of  $h^2$ , along with point and interval estimates. Phenotypes were scaled to have a mean of 0 and standard deviation of 1, and a uniform prior on  $h^2$  was obtained by setting priors on  $\tau^{-2}$  and  $\sigma^{-2}$  to  $\text{Ga}(1, 1)$ , with other settings being default.

### 2.3 QTL mapping

QTL were identified by genome-wide association of imputed SNPs. This was performed in three steps. First, as in previous work (Solberg Woods *et al.* 2012), we obtained a probabilistic reconstruction of each rat’s haplotype mosaic, that is, the configuration of inherited founder haplotypes that compose its genome, using a hidden Markov model (HMM), implemented in `R/qt12geno` (Broman 2016), applied to the genotype data on HS rats and their founders. This HMM was used to calculate for each individual  $i = 1, \dots, n$ , at each marker position  $m = 1, \dots, 8218$ , a vector of 36 descent probabilities,  $\mathbf{p}_{im}$ , containing the posterior probability of descent from each of the possible  $\frac{8(8+1)}{2} = 36$  haplotype pairs (diplotypes).  $n$ , the sample size, varies between phenotypes, with

$n = 989$  for those irrespective of tissue harvest age, such as body weight, and  $n = 743$  for those that include only individuals with tissue harvested at 17 weeks of age, such as RetroFat (two rats did not have RetroFat measurements, resulting in  $n = 741$ ). Second, these descent probabilities were used to re-estimate the original SNP genotypes, that is, each  $\mathbf{p}_{ij}$  was used to infer a 3-vector of imputed genotype probabilities  $\mathbf{g}_{ij}$ ; these imputed genotypes, which, unlike their raw counterparts, were both complete and relatively robust to genotyping error, were carried forward into subsequent analyses. Third, at each SNP, we fitted the LMM in Eq 1, setting  $\text{QTL}_i(m) = \beta x_{mi}$  where  $x_{mi}$  is the expectation of the minor allele count (ie, the allele dosage) implied by  $\mathbf{g}_{im}$ , and  $\beta$  is a fixed effect; comparing the maximum likelihood (ML) fit of this model to that of the null model gave a likelihood ratio test and nominal p-value, reported as its negative base 10 logarithm, or logP. (Note that initially we used models testing the association between phenotype and haplotype descent, ie,  $\mathbf{p}_{im}$ , directly, as in the region-wide mapping of Solberg Woods *et al.* (2012), due to a combination of uncertainty in haplotype descent and strong imbalances in the estimated haplotype frequencies.)

Genome-wide significance thresholds for logP scores were estimated by parametric bootstrap samples from the fitted null (Valdar *et al.* 2009; Solberg Woods *et al.* 2010), with Bonferroni thresholds, which would be highly conservative due to the serial LD structure, calculated for comparison.

LD intervals for the detected QTL were defined by including neighboring markers that met a set level of LD, measured with the squared correlation coefficient  $r^2$ ; we used  $r^2 = 0.5$  to define intervals based on the plots of the SNP associations overlaid with LD information.

## 2.4 Fine-mapping through Group-LASSO with fractional resample model averaging

To prioritize SNP variants within the RetroFat chromosome 6 QTL interval, we used the multi-SNP modeling method LLARRMA-dawg (Sabourin *et al.* 2015), which we applied to the imputed SNP genotypes and a population structure-corrected version of the phenotype, namely the phenotypic residuals of the null model. LLARRMA-dawg uses a combination of variable selection and resampling to identify SNPs that have stable, independent associations with the phenotype. Each SNP receives a resample model inclusion probability (RMIP), an estimate of the probability it would be included in a parsimonious multi-SNP model applied to a resampling of the individuals. SNPs with high RMIPs thus represent stronger candidates, and the existence of multiple SNPs with a high RMIP is consistent with the presence of multiple independent signals.

## 2.5 Estimating diplotype substitution effects at detected QTL

For detected QTL, the effect of substituting alternate diplotypes was estimated using the Diploffect model (Zhang *et al.* 2014), which can help identify interesting alleles of the candidate variants near the mapping signal. Although stability and power, along with the computational demands of a genome-wide analysis, led us to use SNP association for genetic mapping, these were no longer constraints for haplotype effect estimation at an identified QTL. Diploffect is a Bayesian hierarchical approach designed to work with probabilistically inferred haplotype descent, providing shrinkage that mitigates instability from low haplotype frequencies. In addition to the population structure effect in Eq 1, it models two genetic components at the QTL: additive (haplotype) effects, ie the effect of each dose of haplotype (eg WKY); and dominance deviations, those from the additive model for specific combinations of haplotype, (eg, WKY-ACI). Dominance deviations are typically less informed, but their inclusion stabilizes additive effect estimation. Both have their own variance parameters,  $\tau_{\text{add}}^2$  and  $\tau_{\text{dom}}^2$ , with QTL effect size recorded as the intraclass correlation coefficient

$$\rho_{\text{QTL}} = \frac{\tau_{\text{QTL}}^2}{\tau_{\text{QTL}}^2 + \tau^2 + \sigma^2},$$

where  $\tau_{\text{QTL}}^2 = \tau_{\text{add}}^2 + \tau_{\text{dom}}^2$ . The model was fitted using 200 importance samples from INLA (Rue *et al.* 2009; Holand *et al.* 2013), with phenotype transformations and variance component priors set as for heritability estimation above.

### 3 Analysis of RNA-Seq data

Total RNA was extracted from the livers of 398 of the HS rats using Trizol, followed by library preparation using Illumina’s TruSeq Stranded mRNA library kit and sequencing on an Illumina HiSeq2500 (Illumina, Inc., San Diego, CA). BN reference genome sequence (genome build Rn6) and GTF files were obtained from Ensembl. RSEM (v1.3.0) `rsem-prepare-reference` function was used to extract the transcript sequences from the genome (Li & Dewey 2011) and to build Bowtie2 indices (Bowtie2 v2.2.8) (Langmead & Salzberg 2012). RSEM `rsem-calculate-expression` function was then used to execute Bowtie2 to align reads of each sample to the transcriptome prepared above and to compute transcript level and gene level expression abundance. Trim Galore ([http://www.bioinformatics.babraham.ac.uk/projects/trim\\_galore/](http://www.bioinformatics.babraham.ac.uk/projects/trim_galore/)) was used to perform quality-based trimming with a cutoff at Q=20. Seven animals were removed due to low number of input reads.

### 4 Mediation analysis of phenotype, expression, and QTL

Mediation analysis was used to identify genes with expression levels that mediate the relationship between QTL and physiological phenotype. Expression levels of genes contained within the LD-based physiological QTL intervals were assessed as potential candidates as full mediators (intermediates that completely explain the association between SNP and phenotype) and partial mediators (intermediates that explain some of the association between SNP and phenotype). Similar to Baron & Kenny (1986) and adapted for genetic data as in Battle *et al.* (2014), evidence of mediation was assessed by a series of association tests, presented as a series of steps below, evaluating the relationships between previously mapped phenotype QTL ( $X$ ), some transformation of the expression of level of a candidate mediator gene  $j = 1, \dots, J$  ( $M$ ), and some transformation of the phenotype ( $Y$ ).

1. **Potential mediators:** The relationship, represented as an arrow, with directionality encoding causality,  $X \rightarrow M$  is evaluated for all  $J$  candidate genes in the physiological QTL interval with non-zero expression in greater than 0.25 of the  $n$  rats by testing for the association between QTL and expression of gene  $j$  via the regression model

$$f(\text{gene.expression}_{ij}) = \text{mapped.QTL}_i + u_i + \text{residual}_i, \quad (2)$$

where briefly  $f(\text{gene.expression}_{ij})$  is the expression level for gene  $j$  of rat  $i$  subject to some normalizing transformation, often a rank inverse normal transformation,  $\text{mapped.QTL}_i$  is the effect of the mapped QTL for rat  $i$ , and  $u_i$  and  $\text{residual}_i$  are respectively the polygenic and individual error terms as described in Eq 1. The maximum likelihood fit of the model in Eq 2 is compared with the null model (same as Eq 2 with  $\text{mapped.QTL}_i$  omitted) to produce a likelihood ratio statistic and corresponding p-value. The p-values are converted to q-values using the Benjamini-Hochberg false discovery rate (FDR) method (Benjamini & Hochberg 1995).  $X \rightarrow M$  for gene  $j$  is considered satisfied if  $\text{q-value}_j < 0.1$ . A lenient FDR controlling approach to multiple testing is used because the candidate set of genes is constrained to those local to the QTL interval, as well as the mediation analysis including further tests to satisfy mediator status. The set  $K$  ( $K \leq J$ ) genes represent candidate mediators, and are also likely co-localizing eQTL to the QTL.

2. **Full mediators:** The relationship  $X \perp\!\!\!\perp Y|M$  is representative of  $M$  being a full mediator of  $X$  on  $Y$ , suggesting that  $X \rightarrow M \rightarrow Y$ , specifically that  $X$  does not affect  $Y$  outside of through  $M$ . The support for this relationship in the data is evaluated by comparing the following regression models:

$$f(y_i) = \text{mapped.QTL}_i + f(\text{gene.expression}_{ij}) + u_i + \text{residual}_i, \quad (3)$$

and

$$f(y_i) = f(\text{gene.expression}_{ij}) + u_i + \text{residual}_i, \quad (4)$$

where Eq 3 is the alternative model and Eq 4 is the null model for a likelihood ratio test. The expression level of gene  $k$  is called a full mediator if  $\text{p-value}_k > 0.05$ , representing the situation in which the effect of QTL on the phenotype is fully explained by expression of gene  $k$ . After testing for all  $K$  candidate mediators,  $S$  ( $0 \leq S \leq K$ ) full mediators are called.

3. **Partial mediators:** The relationship  $M \rightarrow Y|X$  is representative of  $M$  being a partial mediator of  $X$  onto  $Y$ . To test the support for this relationship, Eq 3 for each candidate partial mediator  $t$  ( $T = K - S$ ) is compared to

$$f(y_i) = \text{mapped.QTL}_i + u_i + \text{residual}_i, \quad (5)$$

producing a likelihood ratio statistic and p-value. The FDR controlling approach is used again to obtain corresponding q-values. If  $\text{q-value}_t < 0.1$ , expression of gene  $t$  is called a partial mediator of the relationship between the QTL and the phenotype. Gene  $t$  could also represent an independent effect on the phenotype from the QTL.

4. **Consistency of effects:** The consistency of the signs of the effect of the relationships of  $X$  through the mediator  $M$  onto  $Y$  ( $X \rightarrow M \rightarrow Y$ ) with  $X$  on  $Y$  ( $X \rightarrow Y$ ) was checked for all called mediators.  $X \overset{\pm}{\rightarrow} Y$  means that  $X$  causally increases  $Y$ , whereas  $X \overset{-}{\rightarrow} Y$  means that  $X$  causally decreases  $Y$ . Consistent signs for  $X \overset{\pm}{\rightarrow} Y$  would be  $X \overset{\pm}{\rightarrow} M \overset{\pm}{\rightarrow} Y$  or  $X \overset{-}{\rightarrow} M \overset{-}{\rightarrow} Y$ . Similarly, for the  $X \overset{-}{\rightarrow} Y$  relationship, consistent mediation relationships would be  $X \overset{\pm}{\rightarrow} M \overset{-}{\rightarrow} Y$  or  $X \overset{-}{\rightarrow} M \overset{\pm}{\rightarrow} Y$ . Inconsistent signs, also referred to as paradoxical effects, occur when signs of the relationships to and from the mediator are not consistent with the sign of the relationship from  $X$  to  $Y$ , suggesting that  $M$  potentially acts as a suppressive mediator of the relationship  $X \rightarrow Y$ .

The validity of the causal inference from the mediation analysis depends on the underlying relationships following a directed acyclic graph (DAG). If cycles are present in the graph, the causal inference will likely not be valid. Cycles cannot exist with  $X \rightarrow Y$  and  $X \rightarrow M$  because the QTL genotype is essentially fixed and cannot be modulated by other quantities. Notably the assumption is made that  $M \rightarrow Y$ , and that  $M \leftarrow Y$  does not occur, though it is plausible that a QTL could modulate a phenotype ( $X \rightarrow Y$ ), which leads the phenotype to modulate expression of certain genes ( $Y \rightarrow M$ ). These types of relationships would produce significant associations whose causal directionality would be misinterpreted by the mediation analysis, thus their inference is dependent on the assumption.

## 5 Mediation analysis results

Gene expression data from the liver was measured on 398 of the 989 HS rats (all in the cohort with tissue harvested at 17 weeks of life). The three QTL intervals (RetroFat chromosome 1 and chromosome 6 loci and body weight chromosome 4 locus) were evaluated with mediation analysis in an attempt to identify and prioritize possible candidates that could affect the phenotypes through their expression level variation.

### 5.1 Body weight chromosome 4 locus

The QTL interval for this locus contained 11 genes (**Table S3**). Three of these had liver expression measured. The main candidate *Grid2* was not sufficiently expressed (non-zero expression proportion  $< 0.25$ ) in liver tissue. The expression levels of the other two genes (*Ccser1* and *LOC108350839*) were not significantly associated with the QTL ( $X \rightarrow M$  was not satisfied).

### 5.2 RetroFat chromosome 1 locus

The QTL interval contained 15 genes (**Table S2**), of which 5 were contained in the expression data (*Emx2*, *Rab11fip2*, *Fam204a*, *Prlhr*, and *Cacul1*). *Emx2* and the primary candidate *Prlhr* were not sufficiently expressed in the liver. Similar to as in body weight, the remaining 3 genes' expression levels were not significantly associated with the QTL.

### 5.3 RetroFat chromosome 6 locus

The interval for this QTL is much wider than the previous intervals, and contains 130 genes (**Table S1**), of which 114 were measured in the liver expression data. Of the 114, 36 genes had non-zero expression below 0.25, leaving 78 genes for which to evaluate  $X \rightarrow M$ . 14 genes (**Table S4**) had a significant association (q-value  $< 0.1$ ) between expression levels and the QTL. These 14 candidate mediators were then tested for evidence of being full mediators. *Krtcap3* was called a full mediator (p-value = 0.15). The remaining 13 were evaluated as partial mediators, resulting in 5 genes being selected (q-value  $< 0.1$ ) (**Table S5**). As *Krtcap3* was a strong candidate as a full mediator, we replaced the QTL in the model of RetroFat with it. Each partial mediator was then individually included in a regression model of RetroFat with *Krtcap3* and compared to the null model with only *Krtcap3* (**Table S5**). Only *Slc30a3* remained significant, suggesting that it is the best candidate as an additional regulator of RetroFat, potentially separately from the QTL/*Krtcap3* signal.

## 6 Figures

### 6.1 Principal component analysis

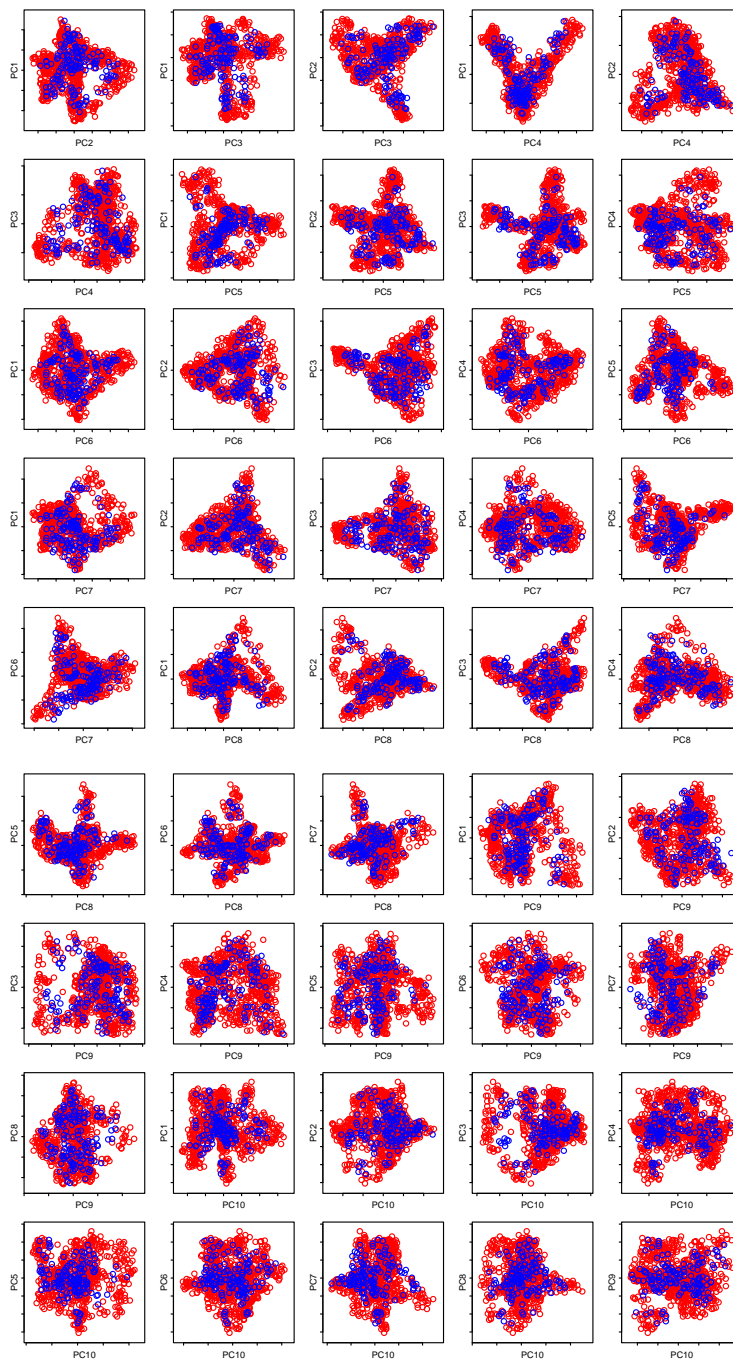

Figure S1: Principal component analysis for the first ten principal components of genotypes between two genotyping centers. Those genotyped at Hudson Alpha are plotted in red and those genotyped at Vanderbilt are plotted in blue. For all plots, red and blue points fall within the same general region indicating that there are no systematic differences in genotype between the two centers.

## 6.2 LLARRMA-dawg fine-mapping interval

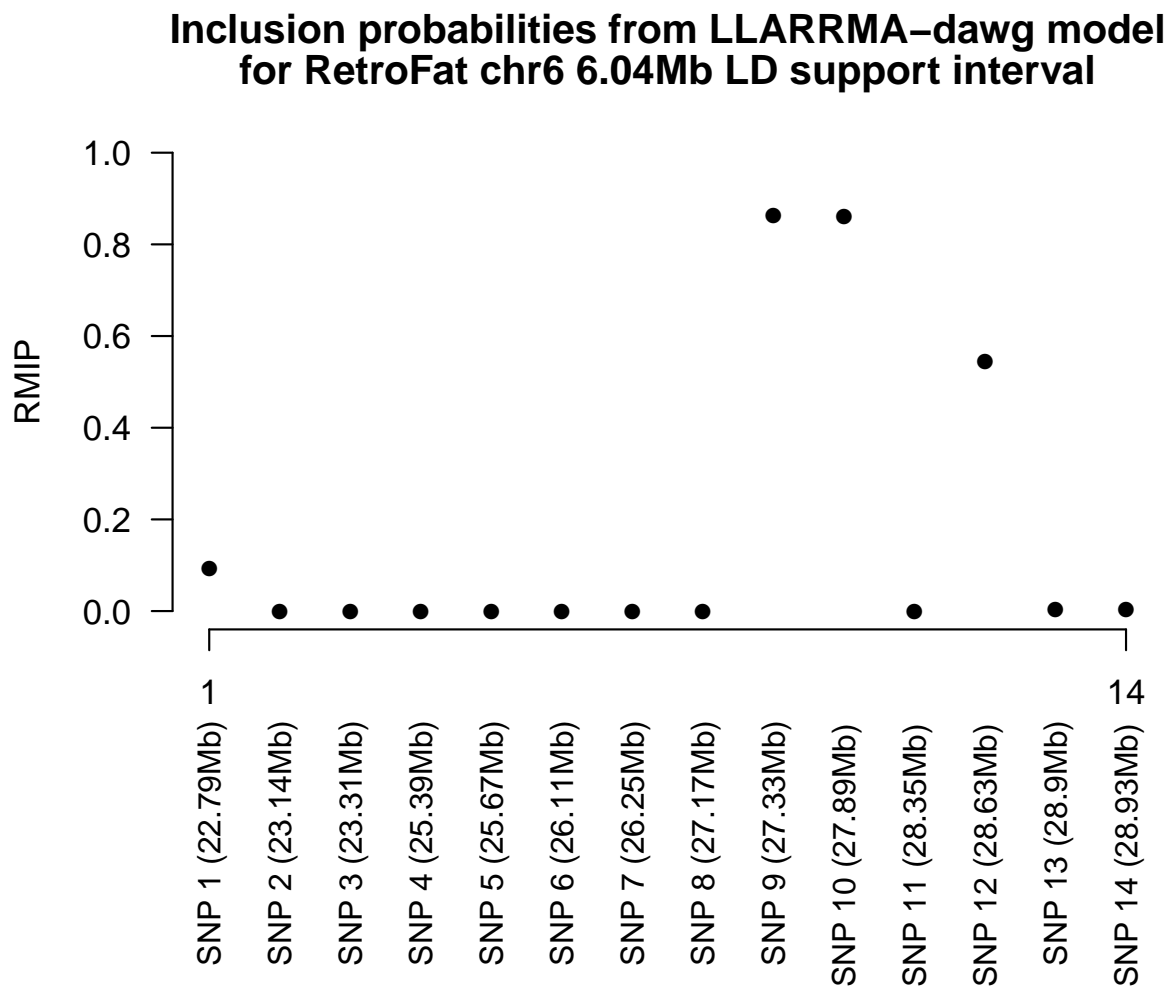

Figure S2: Fine-mapping of the chromosome 6 locus using LLARRMA-dawg reduced the LD support interval from 6.14 Mb to 1.46 Mb. LLARRMA-dawg jointly models and selects SNPs in a region, and returns probabilities corresponding to how often a SNP was included over many re-samples of the data (RMIP). Multiple SNPs with high RMIP suggests the potential for multiple independent signals beneath the QTL peak.



### 6.3 Genes present in RetroFat chromosome 6 fine-mapping interval

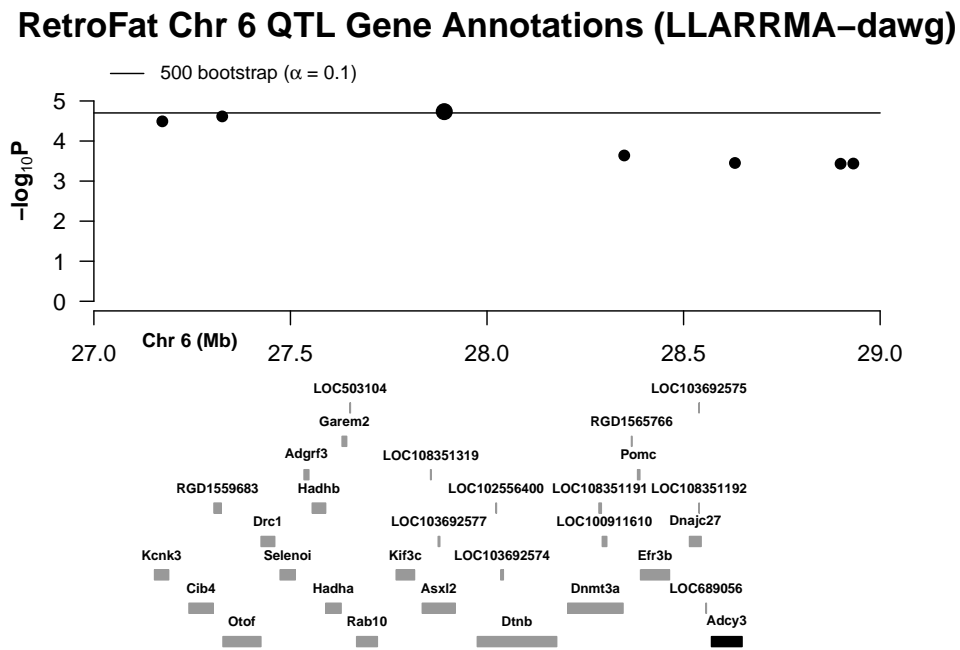

Figure S3: The SNP association (7 markers) present in the LLARRMA-dawg fine-mapping interval (**Figure S2**), including the annotations of the 30 genes local to the region. The candidate gene *Adcy3* is in bold, and possesses a non-synonymous WKY variant that is predicted to alter protein function (**Figure 3E**).

6.4 Candidate mediators: *Krtcap3* and *Slc30a3*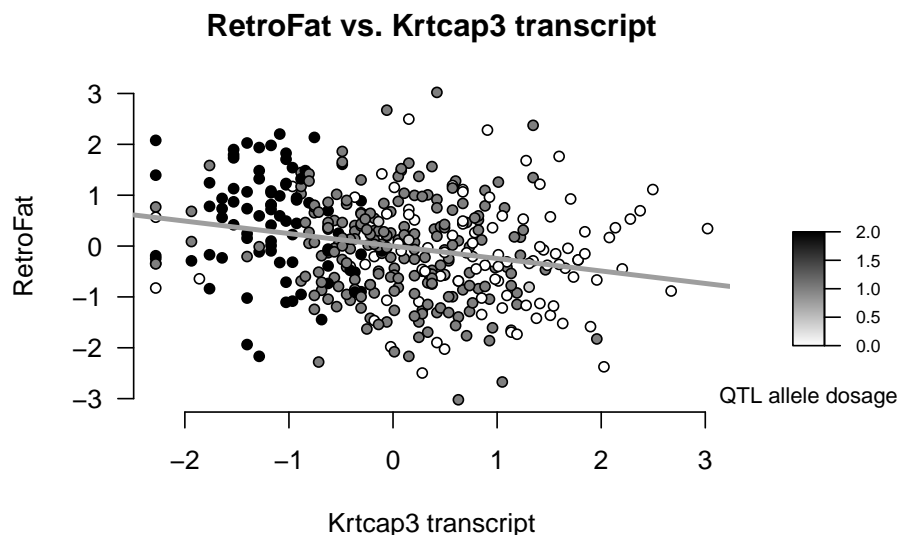

(a) *Krtcap3* expression is negatively correlated with RetroFatg (negative trend line). Genotype dosage of the QTL peak SNP is positively associated with RetroFat, and negatively associated with *Krtcap3* expression, which matches Figure 5.

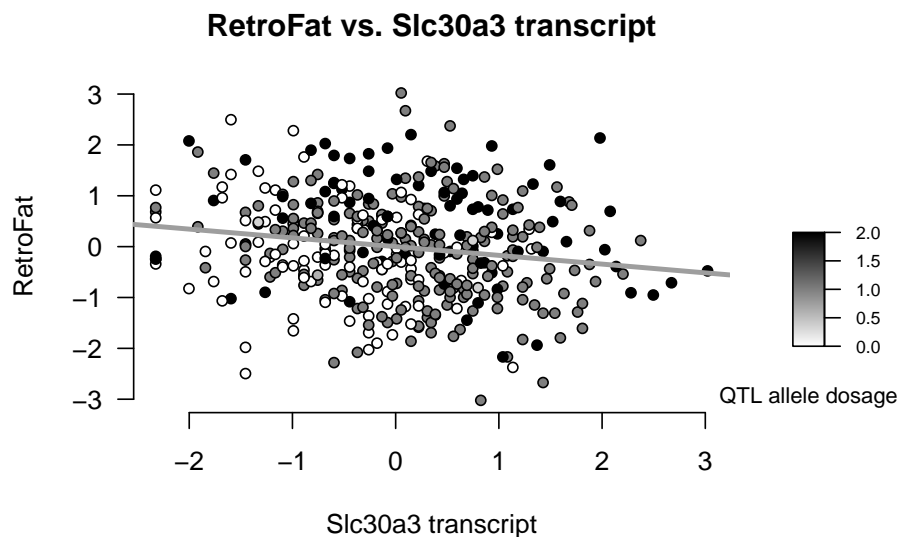

(b) In contrast to *Krtcap3*, the peak SNP minor allele dosage is positive associated with *Slc30a3*, although its expression is negatively correlated with RetroFatg (negative trend line). The mediation path through *Slc30a3* is inconsistent with the QTL relationship with RetroFat, suggesting that *Slc30a3* may actually act in a suppressive manner with respect to the QTL effect.

Figure S4: Scatterplot of RetroFat and mediator expression levels, with data points colored by the peak SNP minor allele dosages at the QTL. RetroFat and expression levels are rank-inverse normal transformed.

## 7 Tables

### 7.1 Genes in RetroFat chromosome 6 QTL interval

Table S1: Genes in RetroFat chromosome 6 QTL interval.

| Gene Symbol  | Gene Name                                                     | Start Location | Non-synonymous variants in WKY founder† | Polyphen prediction |
|--------------|---------------------------------------------------------------|----------------|-----------------------------------------|---------------------|
| Alk          | ALK receptor tyrosine kinase                                  | 22696415       |                                         |                     |
| LOC108351180 | uncharacterized                                               | 22988727       |                                         |                     |
| LOC108351181 | uncharacterized                                               | 23205628       |                                         |                     |
| Clip4        | CAP-GLY domain containing linker protein family, member 4     | 23222020       |                                         |                     |
| LOC103692578 | basic proline-rich protein-like                               | 23298261       |                                         |                     |
| RGD1304963   | similar to hypothetical protein MGC38716                      | 23337507       |                                         |                     |
| Togaram2     | TOG array regulator of axonemal microtubules 2                | 23358762       |                                         |                     |
| Wdr43*       | WD repeat domain 43                                           | 23433532       |                                         |                     |
| Trnac-gca30  | transfer RNA cysteine (anticodon GCA) 30                      | 23487063       |                                         |                     |
| LOC102551341 | tRNA (adenine(58)-N(1))-methyltransferase, mitochondrial-like | 23487545       |                                         |                     |
| Spdya        | speedy/RINGO cell cycle regulator family member A             | 23493686       | 23495595                                | unknown             |
| LOC102548558 | protein tyrosine phosphatase type IVA 1-like                  | 23493704       |                                         |                     |
| Ppp1cb*      | protein phosphatase 1 catalytic subunit beta                  | 23548507       |                                         |                     |
| LOC108351182 | ALK tyrosine kinase receptor-like                             | 23725713       |                                         |                     |
| LOC298795    | similar to 14-3-3 protein sigma                               | 23757225       |                                         |                     |
| LOC108351183 | uncharacterized                                               | 23771355       |                                         |                     |
| LOC103692567 | uncharacterized                                               | 23885316       |                                         |                     |
| LOC108351327 | glyceraldehyde-3-phosphate dehydrogenase pseudogene           | 23936327       |                                         |                     |
| LOC103692568 | uncharacterized                                               | 23986197       |                                         |                     |
| LOC102553396 | uncharacterized                                               | 24064737       |                                         |                     |
| Ypel5        | yippee-like 5                                                 | 24069351       |                                         |                     |
| Lbh          | limb bud and heart development                                | 24154207       |                                         |                     |
| LOC108351184 | uncharacterized                                               | 24192828       |                                         |                     |
| LOC108351185 | uncharacterized                                               | 24256909       |                                         |                     |
| LOC102547591 | uncharacterized                                               | 24336223       |                                         |                     |
| LOC100912066 | uncharacterized                                               | 24342924       |                                         |                     |
| Lclat1       | lysocardiolipin acyltransferase 1                             | 24377398       |                                         |                     |
| LOC102547438 | uncharacterized                                               | 24527464       |                                         |                     |
| LOC685881    | hypothetical protein                                          | 24562761       |                                         |                     |
| Capn13       | calpain 13                                                    | 24579590       |                                         |                     |
| LOC102554046 | uncharacterized                                               | 24623564       |                                         |                     |
| LOC102553955 | uncharacterized                                               | 24657682       |                                         |                     |
| Galnt14      | polypeptide N-acetylgalactosaminyltransferase 14              | 24770308       |                                         |                     |
| Ehd3         | EH-domain containing 3                                        | 25076012       |                                         |                     |
| LOC102554201 | uncharacterized                                               | 25101552       |                                         |                     |
| Xdh          | xanthine dehydrogenase                                        | 25149570       |                                         |                     |
| LOC100363233 | splicing factor 3b, subunit 4-like                            | 25226245       |                                         |                     |
| Srd5a2       | steroid 5 alpha-reductase 2                                   | 25279635       |                                         |                     |

Table S1: Genes in RetroFat chromosome 6 QTL interval (continued).

| Gene Symbol  | Gene Name                                                                        | Start Location | Non-synonymous variants in WKY founder† | Polyphen prediction |
|--------------|----------------------------------------------------------------------------------|----------------|-----------------------------------------|---------------------|
| Plb1         | phospholipase B1                                                                 | 25375699       |                                         |                     |
| LOC683819    | hypothetical protein                                                             | 25565221       |                                         |                     |
| Fosl2        | FOS like 2, AP-1 transcription factor subunit                                    | 25598936       |                                         |                     |
| Babam2       | BRISC and BRCA1 A complex member 2                                               | 25666654       |                                         |                     |
| LOC103692569 | uncharacterized                                                                  | 25885973       |                                         |                     |
| Rbks         | ribokinase                                                                       | 26051568       | 26072561<br>T to A                      | benign              |
| Mrpl33       | mitochondrial ribosomal protein L33                                              | 26130278       |                                         |                     |
| LOC102548914 | uncharacterized                                                                  | 26201017       |                                         |                     |
| Slc4a1ap     | solute carrier family 4 member 1 adaptor protein                                 | 26214083       |                                         |                     |
| Supt7l       | SPT7-like STAGA complex gamma subunit                                            | 26241672       |                                         |                     |
| Gpn1*        | GPN-loop GTPase 1                                                                | 26255081       |                                         |                     |
| RGD1560110   | similar to RIKEN cDNA 4930548H24                                                 | 26278440       |                                         |                     |
| Zfp512       | zinc finger protein 512                                                          | 26284749       |                                         |                     |
| LOC102556504 | titin-like                                                                       | 26322470       |                                         |                     |
| Gckr         | glucokinase regulator                                                            | 26355296       |                                         |                     |
| LOC100910821 | uncharacterized                                                                  | 26387284       |                                         |                     |
| Ift172       | intraflagellar transport 172                                                     | 26390686       |                                         |                     |
| LOC108351187 | uncharacterized                                                                  | 26407404       |                                         |                     |
| LOC108351186 | 60S ribosomal protein L37 pseudogene                                             | 26415619       |                                         |                     |
| LOC103692570 | dihydropyrimidinase-related protein 5-like                                       | 26423841       |                                         |                     |
| Krtcap3*     | keratinocyte associated protein 3                                                | 26485126       |                                         |                     |
| Nrbp1        | nuclear receptor binding protein 1                                               | 26486823       |                                         |                     |
| Ppm1g        | protein phosphatase, Mg <sup>2+</sup> /Mn <sup>2+</sup> dependent, 1G            | 26517840       |                                         |                     |
| Zfp513       | zinc finger protein 513                                                          | 26537707       |                                         |                     |
| Snx17        | sorting nexin 17                                                                 | 26541137       |                                         |                     |
| Eif2b4       | eukaryotic translation initiation factor 2B subunit delta                        | 26546917       |                                         |                     |
| Gtf3c2       | general transcription factor IIIC subunit 2                                      | 26560601       | 26581578<br>T to C                      | unknown             |
| Mpv17        | MpV17 mitochondrial inner membrane protein                                       | 26585713       |                                         |                     |
| Ucn          | urocortin                                                                        | 26602144       |                                         |                     |
| Trim54       | tripartite motif-containing 54                                                   | 26603364       |                                         |                     |
| Dnajc5g      | DnaJ heat shock protein family (Hsp40) member C5 gamma                           | 26625526       |                                         |                     |
| Slc30a3*     | solute carrier family 30 member 3                                                | 26629752       |                                         |                     |
| Cad          | carbamoyl-phosphate synthetase 2, aspartate transcarbamylase, and dihydroorotase | 26657507       |                                         |                     |
| Atraid*      | all-trans retinoic acid-induced differentiation factor                           | 26680628       |                                         |                     |
| Slc5a6       | solute carrier family 5 member 6                                                 | 26685823       |                                         |                     |
| Tcf23        | transcription factor 23                                                          | 26763159       |                                         |                     |

Table S1: Genes in RetroFat chromosome 6 QTL interval (continued).

| Gene Symbol       | Gene Name                                                                                                        | Start Location | Non-synonymous variants in WKY founder† | Polyphen prediction |
|-------------------|------------------------------------------------------------------------------------------------------------------|----------------|-----------------------------------------|---------------------|
| Prr30             | proline rich 30                                                                                                  | 26780352       |                                         |                     |
| Preb              | prolactin regulatory element binding                                                                             | 26784088       | 26786379<br>A to G                      | benign              |
| Abhd1             | abhydrolase domain containing 1                                                                                  | 26787807       |                                         |                     |
| Cgref1            | cell growth regulator with EF hand domain 1                                                                      | 26797126       |                                         |                     |
| Khk               | ketoheokinase                                                                                                    | 26810577       |                                         |                     |
| Emilin1           | elastin microfibril interfacier 1                                                                                | 26821249       |                                         |                     |
| LOC103692571      | uncharacterized                                                                                                  | 26833107       |                                         |                     |
| Ost4              | oligosaccharyltransferase complex subunit 4, non-catalytic                                                       | 26836216       |                                         |                     |
| Agbl5             | ATP/GTP binding protein-like 5                                                                                   | 26837299       |                                         |                     |
| Trnaa-agc6        | transfer RNA alanine (anticodon AGC) 6                                                                           | 26856068       |                                         |                     |
| Trnay-gua         | transfer RNA tyrosine (anticodon GUA)                                                                            | 26856459       |                                         |                     |
| Trnay-gua3        | transfer RNA tyrosine (anticodon GUA) 3                                                                          | 26856459       |                                         |                     |
| Tmem214           | transmembrane protein 214                                                                                        | 26867638       |                                         |                     |
| Mapre3            | microtubule-associated protein, RP/EB family, member 3                                                           | 26878738       |                                         |                     |
| LOC108351190      | uncharacterized                                                                                                  | 26890051       |                                         |                     |
| LOC108351189      | uncharacterized                                                                                                  | 26918219       |                                         |                     |
| LOC108351188      | 60S ribosomal protein L37 pseudogene                                                                             | 26931127       |                                         |                     |
| Dpysl5            | dihydropyrimidinase-like 5                                                                                       | 26939696       |                                         |                     |
| LOC103692572      | uncharacterized                                                                                                  | 27069013       |                                         |                     |
| Cenpa             | centromere protein A                                                                                             | 27072259       |                                         |                     |
| Slc35f6           | solute carrier family 35, member F6                                                                              | 27095144       |                                         |                     |
| LOC103692573      | uncharacterized                                                                                                  | 27139210       |                                         |                     |
| <b>Kenk3</b>      | potassium two pore domain channel subfamily K member 3                                                           | 27154274       |                                         |                     |
| <b>Cib4</b>       | calcium and integrin binding family member 4                                                                     | 27241804       |                                         |                     |
| <b>RGD1559683</b> | similar to RIKEN cDNA 1700001C02                                                                                 | 27305402       |                                         |                     |
| <b>Otof</b>       | otofelin                                                                                                         | 27328343       |                                         |                     |
| <b>Drc1</b>       | dynein regulatory complex subunit 1                                                                              | 27425237       | 27428501<br>G to A                      | benign              |
| <b>Selenoi</b>    | selenoprotein I                                                                                                  | 27473748       |                                         |                     |
| <b>Adgrf3</b>     | adhesion G protein-coupled receptor F3                                                                           | 27534525       |                                         |                     |
| <b>Hadhb</b>      | hydroxyacyl-CoA dehydrogenase/3-ketoacyl-CoA thiolase/enoyl-CoA hydratase (trifunctional protein), beta subunit  | 27555408       |                                         |                     |
| <b>Hadha</b>      | hydroxyacyl-CoA dehydrogenase/3-ketoacyl-CoA thiolase/enoyl-CoA hydratase (trifunctional protein), alpha subunit | 27589840       |                                         |                     |
| <b>Garem2</b>     | GRB2 associated regulator of MAPK1 subtype 2                                                                     | 27631364       |                                         |                     |
| <b>LOC503104</b>  | similar to retinoblastoma binding protein 4                                                                      | 27651115       |                                         |                     |
| <b>Rab10</b>      | RAB10, member RAS oncogene family                                                                                | 27668387       |                                         |                     |

Table S1: Genes in RetroFat chromosome 6 QTL interval (continued).

| Gene Symbol         | Gene Name                                                    | Start Location | Non-synonymous variants in WKY founder† | Polyphen prediction |
|---------------------|--------------------------------------------------------------|----------------|-----------------------------------------|---------------------|
| <b>Kif3c</b>        | kinesin family member 3C                                     | 27768943       |                                         |                     |
| <b>Asxl2</b>        | additional sex combs like 2, transcriptional regulator       | 27835346       |                                         |                     |
| <b>LOC108351319</b> | 28S ribosomal protein S21, mitochondrial pseudogene          | 27856408       |                                         |                     |
| <b>LOC103692577</b> | RNA pseudouridylylase domain-containing protein 4 pseudogene | 27875868       |                                         |                     |
| <b>Dtnb</b>         | dystrobrevin, beta                                           | 27975302       | 28004664<br>A to G                      | benign              |
| <b>LOC102556400</b> | transcription factor BTF3-like                               | 28022498       |                                         |                     |
| <b>LOC103692574</b> | uncharacterized                                              | 28034953       |                                         |                     |
| <b>Dnmt3a</b>       | DNA methyltransferase 3 alpha                                | 28205375       |                                         |                     |
| <b>LOC108351191</b> | 60S ribosomal protein L37 pseudogene                         | 28284681       |                                         |                     |
| <b>LOC100911610</b> | dihydropyrimidinase-related protein 5-like                   | 28293250       |                                         |                     |
| <b>RGD1565766</b>   | hypothetical gene supported by BC088468; NM_001009712        | 28367389       |                                         |                     |
| <b>Pomc</b>         | proopiomelanocortin                                          | 28382937       |                                         |                     |
| <b>Efr3b</b>        | EFR3 homolog B                                               | 28390541       |                                         |                     |
| <b>Dnajc27</b>      | DnaJ heat shock protein family (Hsp40) member C27            | 28515054       |                                         |                     |
| <b>LOC108351192</b> | cytochrome c oxidase subunit 7B, mitochondrial pseudogene    | 28539158       |                                         |                     |
| <b>LOC103692575</b> | cytochrome c oxidase subunit 7B, mitochondrial pseudogene    | 28539172       |                                         |                     |
| <b>LOC689056</b>    | similar to general transcription factor IIIH, polypeptide 5  | 28556618       |                                         |                     |
| <b>Adecy3</b>       | adenylate cyclase 3                                          | 28570941       | 28572363<br>A to C                      | damaging            |
| <b>Cenpo</b>        | centromere protein O                                         | 28648804       |                                         |                     |
| <b>Ptrhd1</b>       | peptidyl-tRNA hydrolase domain containing 1                  | 28663602       |                                         |                     |
| <b>Ncoal</b>        | nuclear receptor coactivator 1                               | 28677563       |                                         |                     |
| <b>LOC103692576</b> | uncharacterized                                              | 28812571       |                                         |                     |

Genes in bold are found within the most likely region of the QTL based on multi-SNP fine-mapping analysis.

\*Full or partial mediators of RetroFat called by mediation analysis.

†RetroFat chromosome 6 haplotype effects: WKY has decreased fat pad weight (Figure 3D).

## 7.2 Genes in RetroFat chromosome 1 QTL interval

Table S2: Genes in RetroFat chromosome 1 QTL interval.

| Gene Symbol  | Gene Name                                     | Start location | Gene Function (UniProt)                                                                                                                                                                                                                                                                                                                                                                                                                             | Non-synonymous variants in founders with the haplotype effect† |
|--------------|-----------------------------------------------|----------------|-----------------------------------------------------------------------------------------------------------------------------------------------------------------------------------------------------------------------------------------------------------------------------------------------------------------------------------------------------------------------------------------------------------------------------------------------------|----------------------------------------------------------------|
| LOC103691392 | uncharacterized                               | 280573647      | Unknown                                                                                                                                                                                                                                                                                                                                                                                                                                             |                                                                |
| Emx2         | empty spiracles homeobox 2                    | 280633938      | Transcription factor which acts to generate the boundary between the roof and archipallium in the developing brain.                                                                                                                                                                                                                                                                                                                                 |                                                                |
| LOC108349711 | uncharacterized                               | 280653842      | Unknown                                                                                                                                                                                                                                                                                                                                                                                                                                             |                                                                |
| LOC502394    | hypothetical                                  | 280753676      | Unknown                                                                                                                                                                                                                                                                                                                                                                                                                                             |                                                                |
| LOC102555781 | uncharacterized                               | 280796426      | Unknown                                                                                                                                                                                                                                                                                                                                                                                                                                             |                                                                |
| LOC108349712 | uncharacterized                               | 280934585      | Unknown                                                                                                                                                                                                                                                                                                                                                                                                                                             |                                                                |
| Rab11fip2    | RAB11 family interacting protein 2            | 281065346      | A Rab11 effector binding preferentially phosphatidylinositol 3,4,5-trisphosphate (PtdInsP3) and phosphatidic acid (PA) and acting in the regulation of the transport of vesicles from the endosomal recycling compartment (ERC) to the plasma membrane. Involved in insulin granule exocytosis. Also involved in receptor-mediated endocytosis and membrane trafficking of recycling endosomes, probably originating from clathrin-coated vesicles. |                                                                |
| LOC102556164 | uncharacterized                               | 281227923      | Unknown                                                                                                                                                                                                                                                                                                                                                                                                                                             |                                                                |
| LOC102556108 | uncharacterized                               | 281289720      | Unknown                                                                                                                                                                                                                                                                                                                                                                                                                                             |                                                                |
| LOC102556023 | acyl carrier protein, mitochondrial-like      | 281304776      | Unknown                                                                                                                                                                                                                                                                                                                                                                                                                                             |                                                                |
| Fam204a      | family with sequence similarity 204, member A | 281343692      | Unknown                                                                                                                                                                                                                                                                                                                                                                                                                                             |                                                                |

Table S2: Genes in RetroFat chromosome 1 QTL interval (continued).

| Gene Symbol  | Gene Name                            | Start location | Gene Function (UniProt)                                                                                                                | Non-synonymous variants in founders with the haplotype effect† |
|--------------|--------------------------------------|----------------|----------------------------------------------------------------------------------------------------------------------------------------|----------------------------------------------------------------|
| LOC103691393 | uncharacterized                      | 281395030      | Unknown                                                                                                                                |                                                                |
| LOC108349713 | uncharacterized                      | 281397476      | Unknown                                                                                                                                |                                                                |
| <b>Prlhr</b> | prolactin releasing hormone receptor | 281754472      | Receptor for prolactin-releasing peptide (PrRP). Implicated in lactation, <b>regulation of food intake</b> and pain-signal processing. | 281755911<br>C to T<br>translation start site in BUF and WKY   |
| Cacul1       | CDK2-associated, cullin domain 1     | 281814226      | Cell cycle associated protein capable of promoting cell proliferation through the activation of CDK2 at the G1/S phase transition.     |                                                                |

The gene in bold (Prlhr) is the most likely candidate in the region.

†RetroFat chromosome 1 haplotype effects: BUF, MR, WKY haplotypes lead to increased fat pad weight (Figure 6D).



### 7.3 Genes in body weight chromosome 4 QTL interval

Table S3: Genes in body weight chromosome 4 QTL interval.

| Gene Symbol  | Gene Name                                                  | Start location | Gene Function (UniProt)                                                                                                    | Non-synonymous variants in founders with the haplotype effect† |
|--------------|------------------------------------------------------------|----------------|----------------------------------------------------------------------------------------------------------------------------|----------------------------------------------------------------|
| Ccser1       | coiled-coil serine-rich protein 1                          | 91235885       | Unknown, has been associated with cocaine                                                                                  | None                                                           |
| LOC103692146 | uncharacterized                                            | 91601766       | Unknown                                                                                                                    | None                                                           |
| LOC108350840 | uncharacterized                                            | 91959690       | Unknown                                                                                                                    | None                                                           |
| LOC108350839 | high mobility group protein B1-like                        | 92431517       | Unknown                                                                                                                    | None                                                           |
| LOC103692148 | developmental pluripotency-associated protein 2 pseudogene | 92443293       | Unknown                                                                                                                    | None                                                           |
| LOC103692149 | axoneme-associated protein mst101(2)-like                  | 92501663       | Unknown                                                                                                                    | None                                                           |
| LOC103692147 | glutamate receptor ionotropic, delta-2-like                | 93012791       | Unknown                                                                                                                    | None                                                           |
| Hint1-ps1    | histidine triad nucleotide binding protein 1, pseudogene 1 | 93405665       | Pseudogene, likely not functional                                                                                          | None                                                           |
| LOC103692150 | thyrotropin receptor pseudogene                            | 93447412       | Unknown                                                                                                                    | None                                                           |
| LOC108350813 | Ig kappa chain V-II region 26-10-like                      | 93857773       | Unknown                                                                                                                    | None                                                           |
| <b>Grid2</b> | glutamate ionotropic receptor delta type subunit 2         | 94068112       | Receptor for glutamate. L-glutamate acts as an excitatory neurotransmitter at many synapses in the central nervous system. | None                                                           |

The gene in bold (Grid2) is the most likely candidate in the region.

†Body Weight chromosome 4 haplotype effects: ACI, BUF, F344 and MR haplotypes lead to decreased body weight while BN haplotype leads to increased body weight (Figure 7D).

## 7.4 Potential mediators in RetroFat chromosome 6 QTL interval

Table S4: Genes in RetroFat chromosome 6 QTL interval that support X → M relationship.

| Gene Symbol | Gene Name                                                                                                        | Start location | q-value  |
|-------------|------------------------------------------------------------------------------------------------------------------|----------------|----------|
| RGD1304963  | similar to hypothetical protein MGC38716                                                                         | 23337507       | 4.79E-05 |
| Wdr43       | WD repeat domain 43                                                                                              | 23433532       | 7.82E-02 |
| Ppp1cb      | protein phosphatase 1 catalytic subunit beta                                                                     | 23548507       | 7.46E-03 |
| Galnt14     | polypeptide N-acetylgalactosaminyltransferase 14                                                                 | 24770308       | 3.09E-02 |
| Rbks        | ribokinase                                                                                                       | 26051568       | 3.13E-11 |
| Gpn1        | GPN-loop GTPase 1                                                                                                | 26255081       | 3.38E-04 |
| Krtcap3     | keratinocyte associated protein 3                                                                                | 26485126       | 3.30E-41 |
| Slc30a3     | solute carrier family 30 member 3                                                                                | 26629752       | 1.19E-07 |
| Atraid      | all-trans retinoic acid-induced differentiation factor                                                           | 26680628       | 7.46E-03 |
| Dpysl5      | dihydropyrimidinase-like 5                                                                                       | 26939696       | 9.66E-14 |
| Hadha       | hydroxyacyl-CoA dehydrogenase/3-ketoacyl-CoA thiolase/enoyl-CoA hydratase (trifunctional protein), alpha subunit | 27589840       | 3.96E-03 |

## 7.5 Candidate mediators of RetroFat chromosome 6 QTL

Table S5: Genes in RetroFat chromosome 6 QTL interval that mediation analysis supports as candidate mediators of the effect of QTL on RetroFat.

| Gene Symbol    | Gene Name                                              | Start location | Full mediation p-value | Joint with <i>Krtcap3</i> p-value | Consistency with QTL effect |
|----------------|--------------------------------------------------------|----------------|------------------------|-----------------------------------|-----------------------------|
| Wdr43          | WD repeat domain 43                                    | 23433532       | 1.05E-04               | 0.47                              | Inconsistent                |
| Ppp1cb         | protein phosphatase 1 catalytic subunit beta           | 23548507       | 7.36E-05               | 0.28                              | Inconsistent                |
| Gpn1           | GPN-loop GTPase 1                                      | 26255081       | 1.10E-03               | 0.48                              | Consistent                  |
| <b>Krtcap3</b> | keratinocyte associated protein 3                      | 26485126       | 0.15                   | .                                 | Consistent                  |
| <b>Slc30a3</b> | solute carrier family 30 member 3                      | 26629752       | 8.40E-07               | 2.36E-03                          | Inconsistent                |
| Atraid         | all-trans retinoic acid-induced differentiation factor | 26680628       | 6.09E-05               | 0.89                              | Inconsistent                |

Genes in bold are called as mediators.

## References

- Baron, Reuben M., & Kenny, David A. 1986. The Moderator-Mediator Variable Distinction in Social The Moderator-Mediator Variable Distinction in Social Psychological Research: Conceptual, Strategic, and Statistical Considerations. *Journal of Personality and Social Psychology*, **51**(6), 1173–1182.
- Battle, Alexis, Mostafavi, Sara, Zhu, Xiaowei, Potash, James B., Weissman, Myrna M., McCormick, Courtney, Haudenschild, Christian D., Beckman, Kenneth B., Shi, Jianxin, Mei, Rui, Urban, Alexander E., Montgomery, Stephen B., Levinson, Douglas F., & Koller, Daphne. 2014. Characterizing the genetic basis of transcriptome diversity through RNA-sequencing of 922 individuals. *Genome Research*, **24**(1), 14–24.
- Benjamini, Yoav, & Hochberg, Yosef. 1995. Controlling the False Discovery Rate: A Practical and Powerful Approach to Multiple Testing. *Journal of the Royal Statistical Society, Series B*, **57**(1), 289–300.
- Broman, Karl W. 2016. *qtl2geno: Treatment of Marker Genotypes for QTL Experiments*. R package version 0.4-23.
- Gatti, D. M., Svenson, K. L., Shabalín, A., Wu, L.-Y., Valdar, W., Simecek, P., Goodwin, N., Cheng, R., Pomp, D., Palmer, A., Chesler, E. J., Broman, K. W., & Churchill, G. A. 2014. Quantitative Trait Locus Mapping Methods for Diversity Outbred Mice. *G3*, **4**(9), 1623–1633.
- Holand, Anna Marie, Steinsland, Ingelin, Martino, Sara, & Jensen, Henrik. 2013. Animal models and integrated nested Laplace approximations. *G3*, **3**(8), 1241–51.
- Langmead, Ben, & Salzberg, Steven L. 2012. Fast gapped-read alignment with Bowtie 2. *Nature methods*, **9**(4), 357–9.
- Li, Bo, & Dewey, Colin N. 2011. RSEM: accurate transcript quantification from RNA-Seq data with or without a reference genome. *BMC Bioinformatics*, **12**(1), 323.
- Rue, Håvard, Martino, Sara, & Nicolas, Chopin. 2009. Approximate Bayesian inference for latent Gaussian models by using integrated nested Laplace approximations. *Journal of the Royal Statistical Society, Series B*, **71**(2), 319–392.
- Sabourin, Jeremy, Nobel, Andrew B., & Valdar, William. 2015. Fine-Mapping Additive and Dominant SNP Effects Using Group-LASSO and Fractional Resample Model Averaging. *Genetic Epidemiology*, **39**(2), 77–88.
- Solberg Woods, Leah C, Holl, Katie, Tschannen, Michael, & Valdar, William. 2010. Fine-mapping a locus for glucose tolerance using heterogeneous stock rats. *Physiological genomics*, **41**(1), 102–8.
- Solberg Woods, Leah C, Holl, Katie L, Oreper, Daniel, Xie, Yuying, Tsaih, Shirng-Wern, & Valdar, William. 2012. Fine-mapping diabetes-related traits, including insulin resistance, in heterogeneous stock rats. *Physiological genomics*, **44**(21), 1013–26.
- Valdar, William, Holmes, Christopher C, Mott, Richard, & Flint, Jonathan. 2009. Mapping in structured populations by resample model averaging. *Genetics*, **182**(4), 1263–77.
- Zhang, Zhaojun, Wang, Wei, & Valdar, William. 2014. Bayesian modeling of haplotype effects in multiparent populations. *Genetics*, **198**(1), 139–56.
